# Supplementary material for: DNA methylation changes related to nutritional deprivation: a genome-wide analysis of population and in vitro data
Source: PubMed Central journal article supplement (PMC6524251; doi:10.1186/s13148-019-0680-7), 2019-05-16

A.

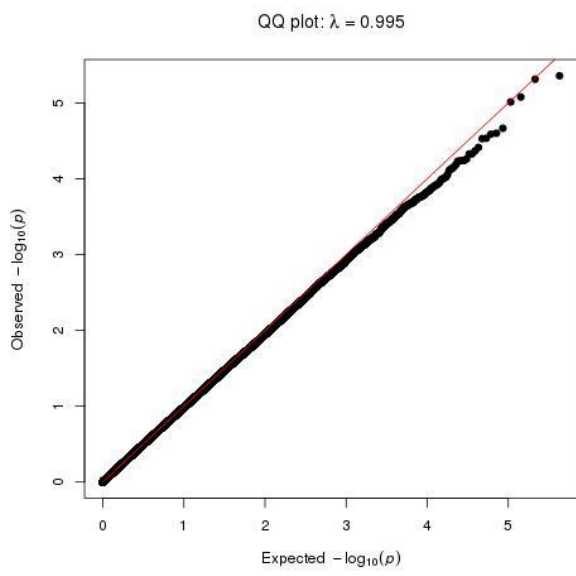

B.

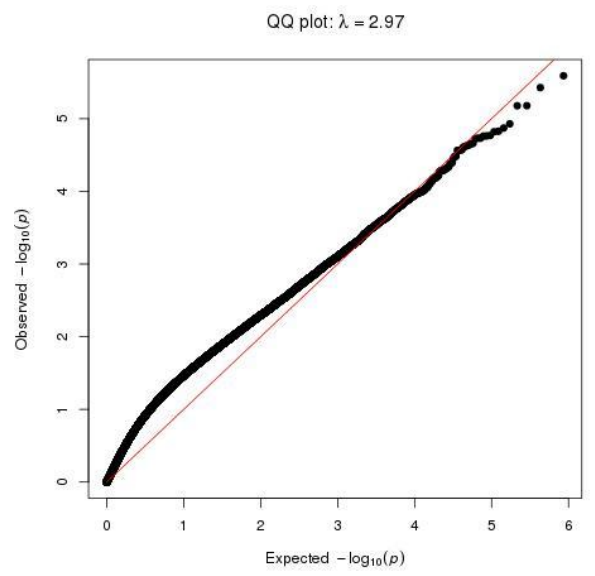

Supplement: 13148_2019_680_MOESM1_ESM.pdf [file 13148_2019_680_MOESM1_ESM.pdf]
